# Supplementary figures and images for: Unraveling Pathogenic Variants and the Protein Interaction Landscape in 20 Families with Early-onset high myopia
Source: Research Square preprint supplement (doi:10.21203/rs.3.rs-7827019/v1), 2025-11-14

**SI Fig1. Pedigree and sanger sequencing of 20 RP family with eoHM**


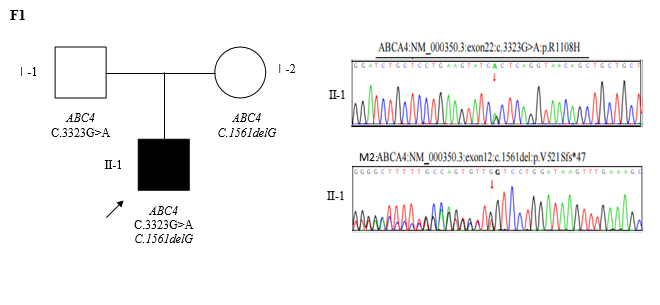


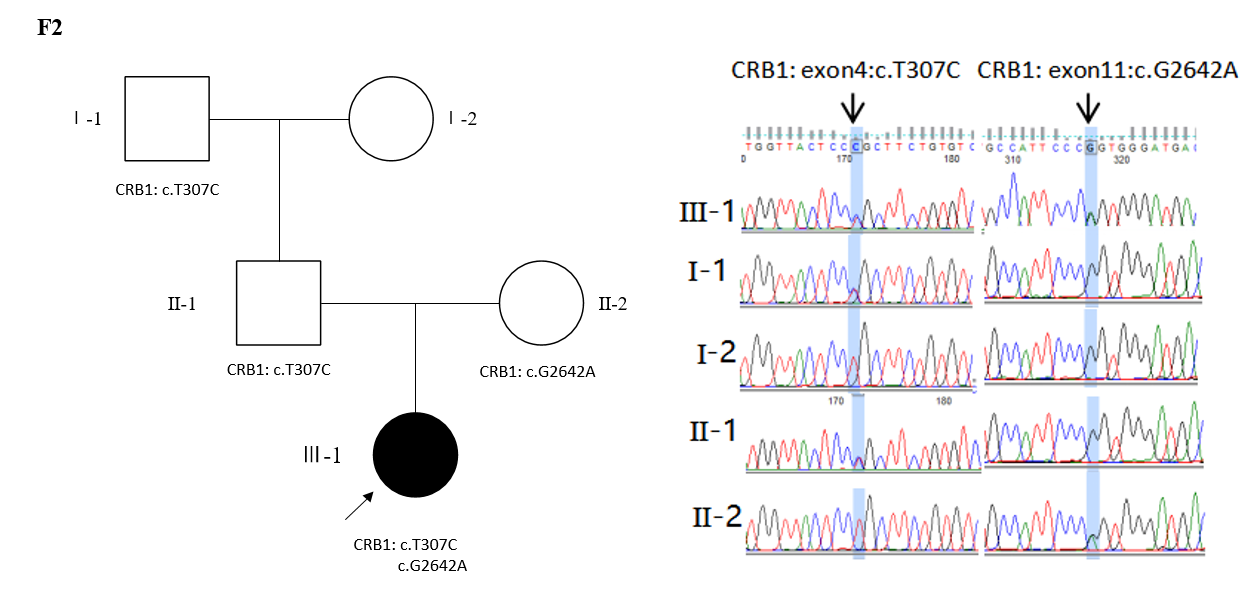


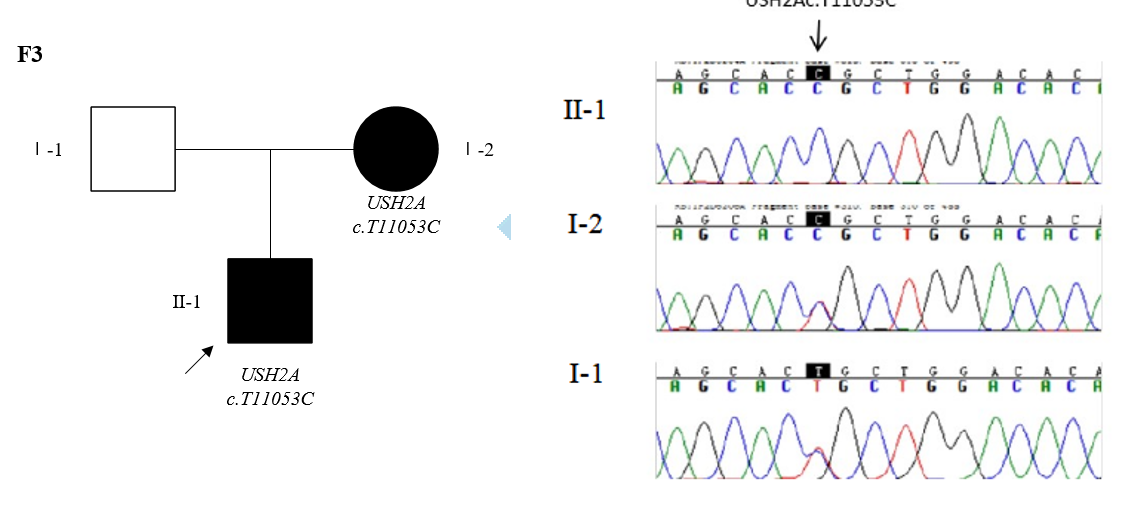


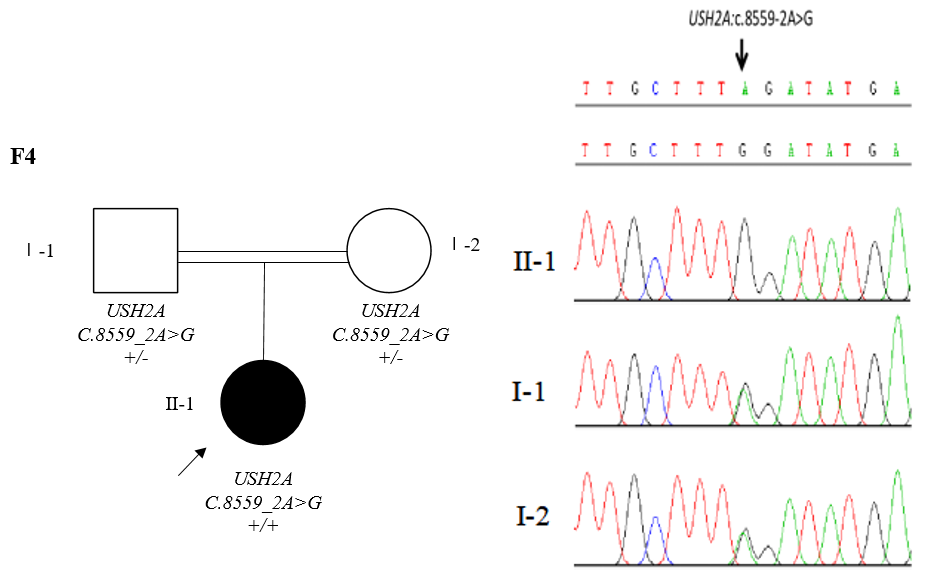


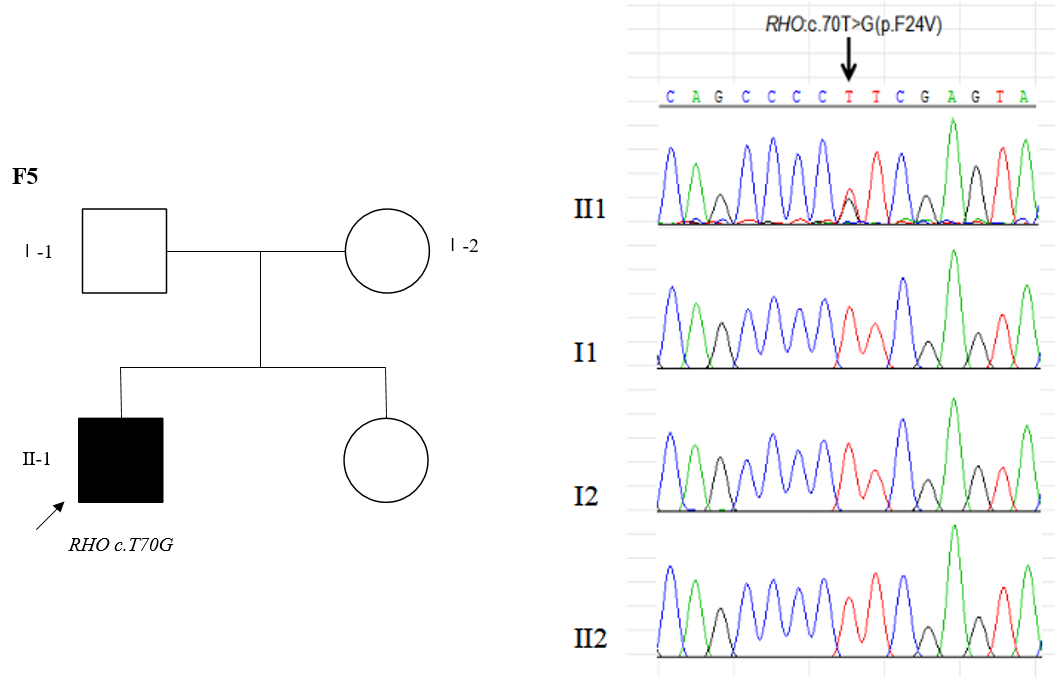


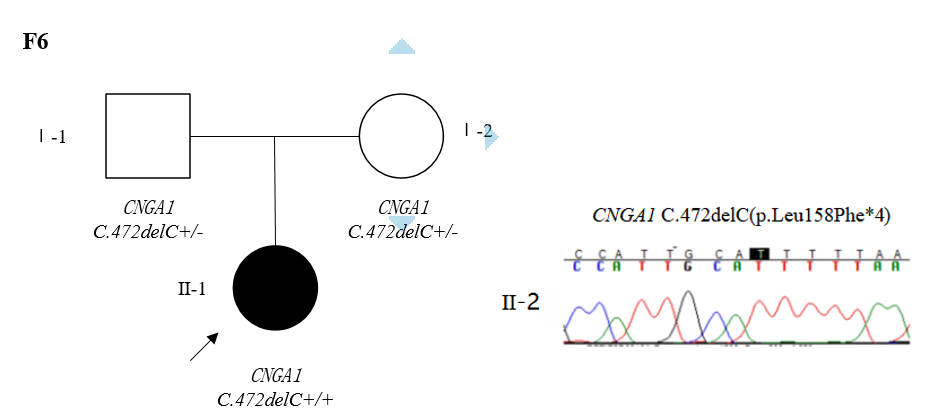


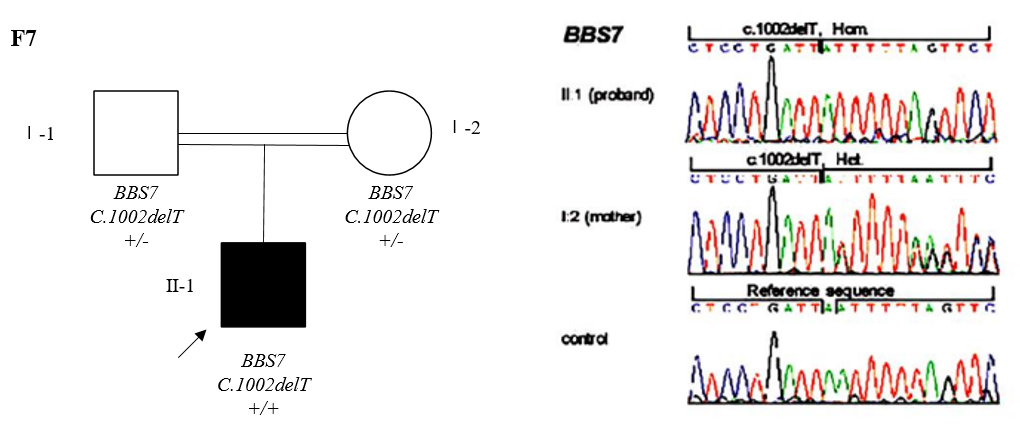


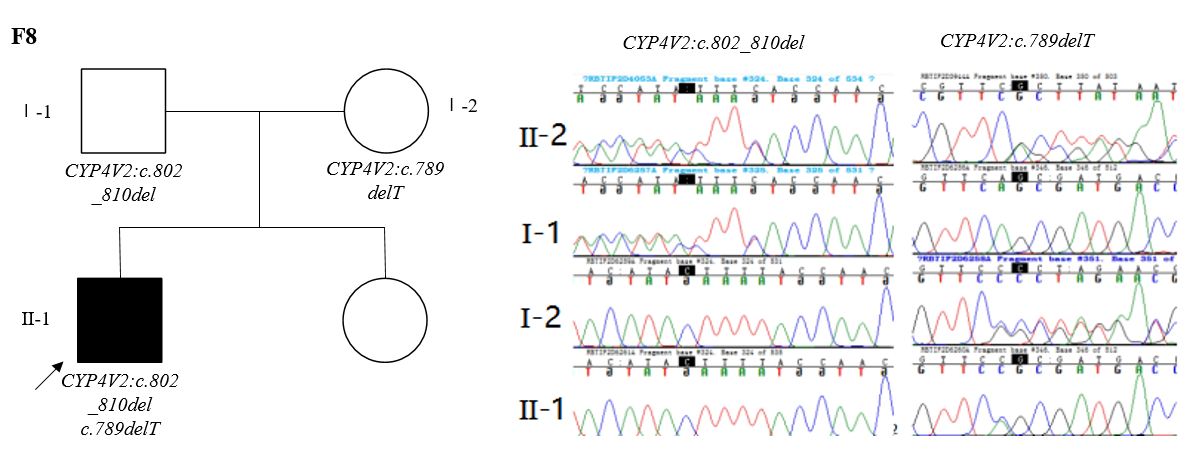


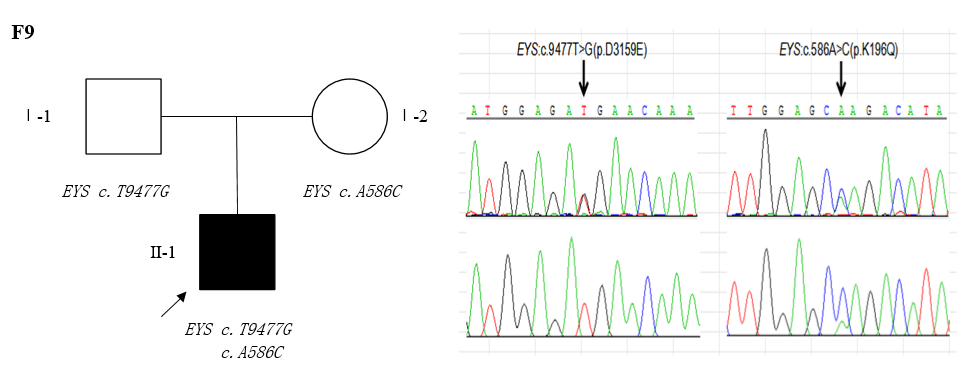


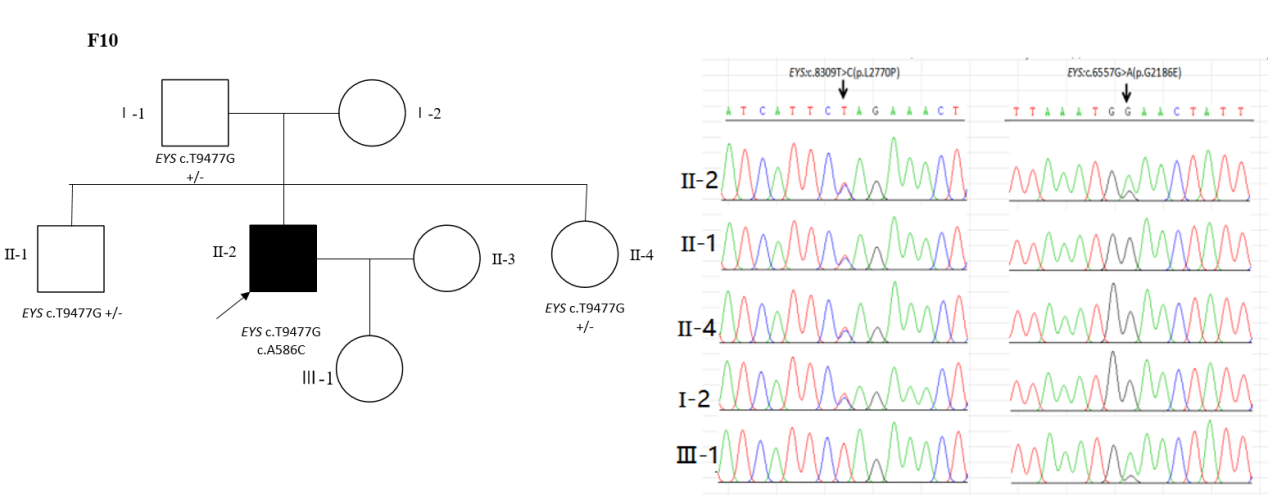


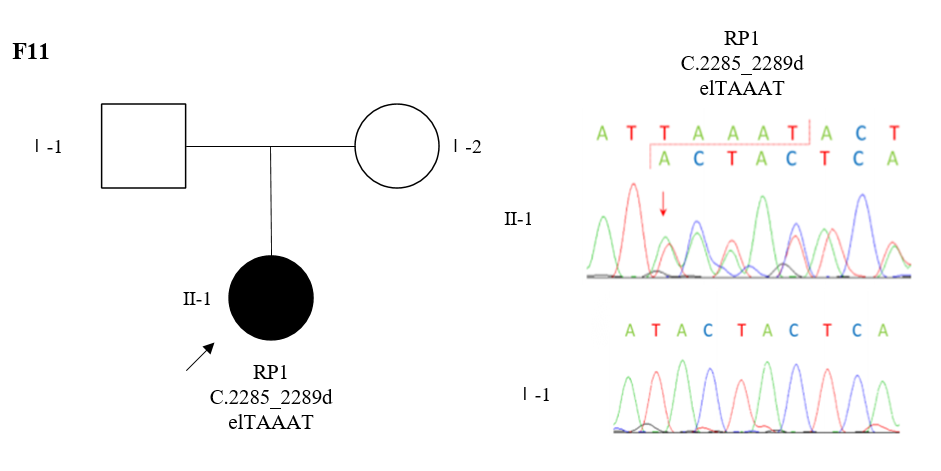


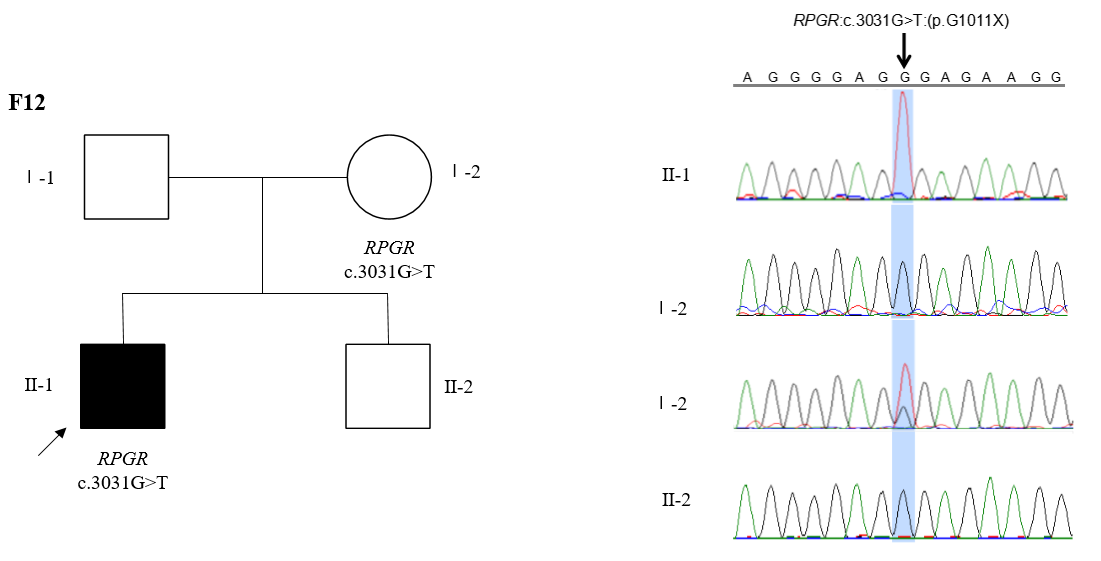


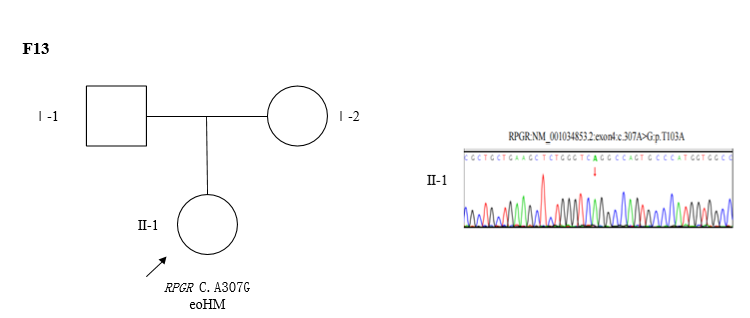


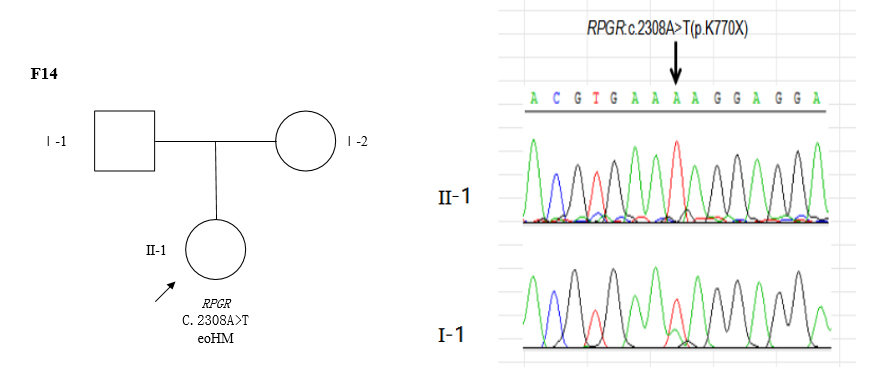


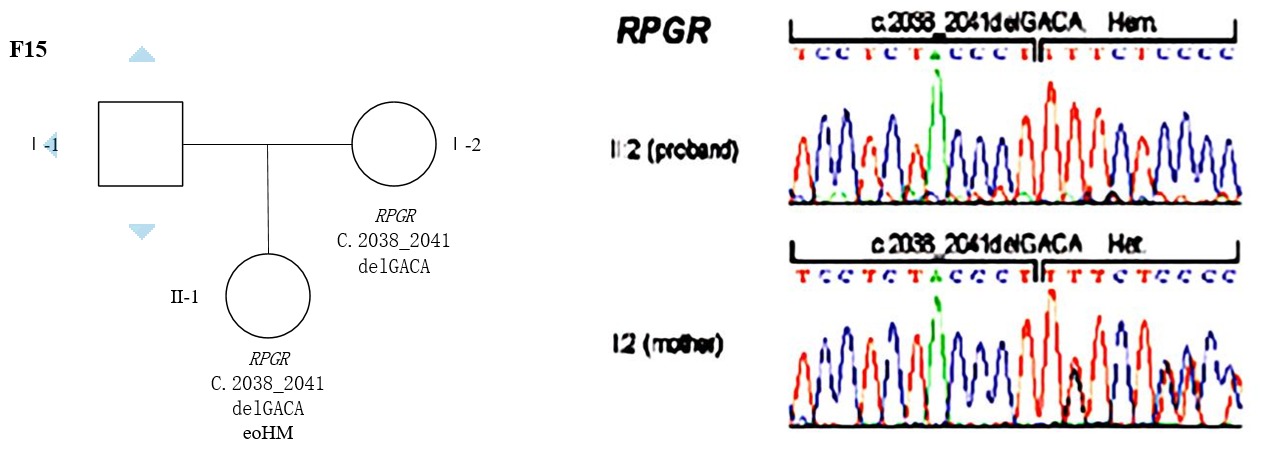


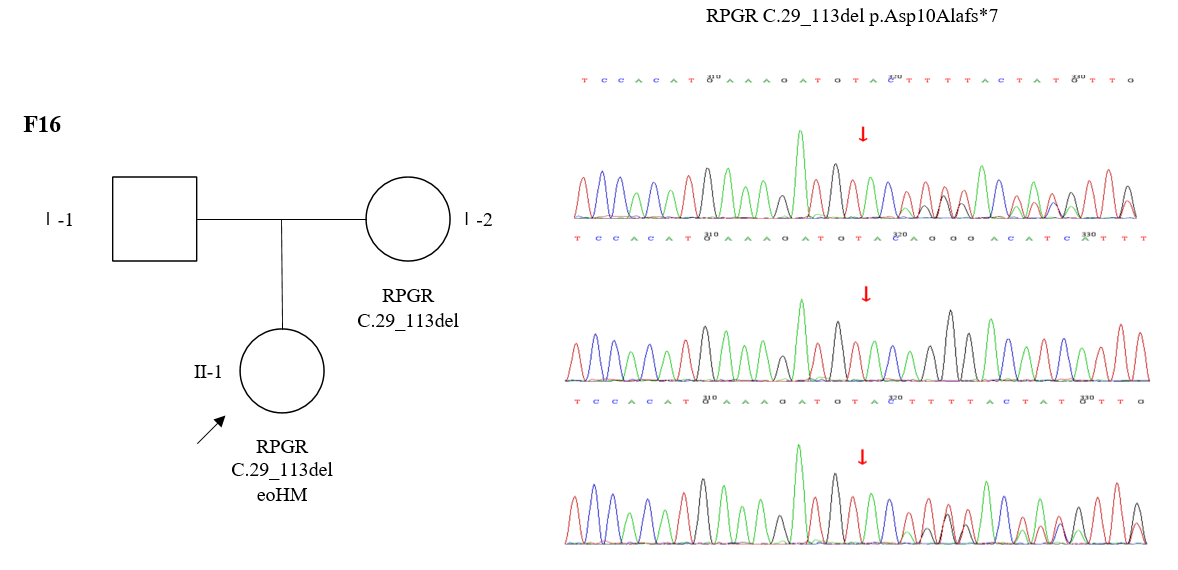


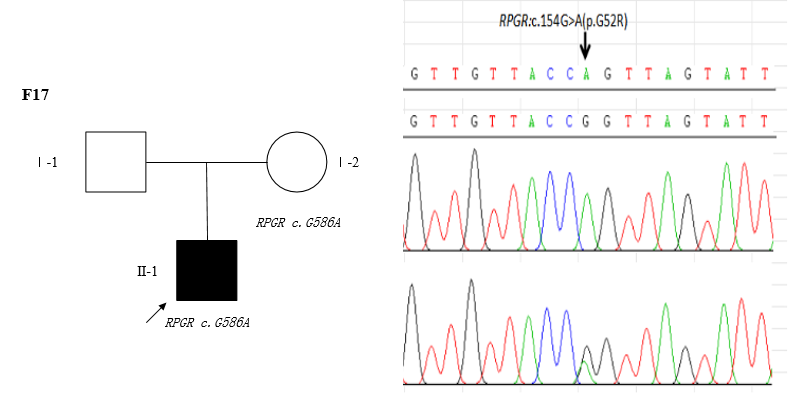


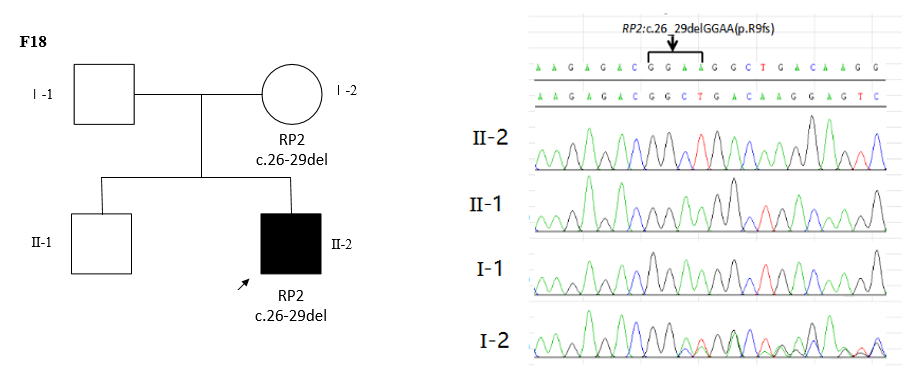


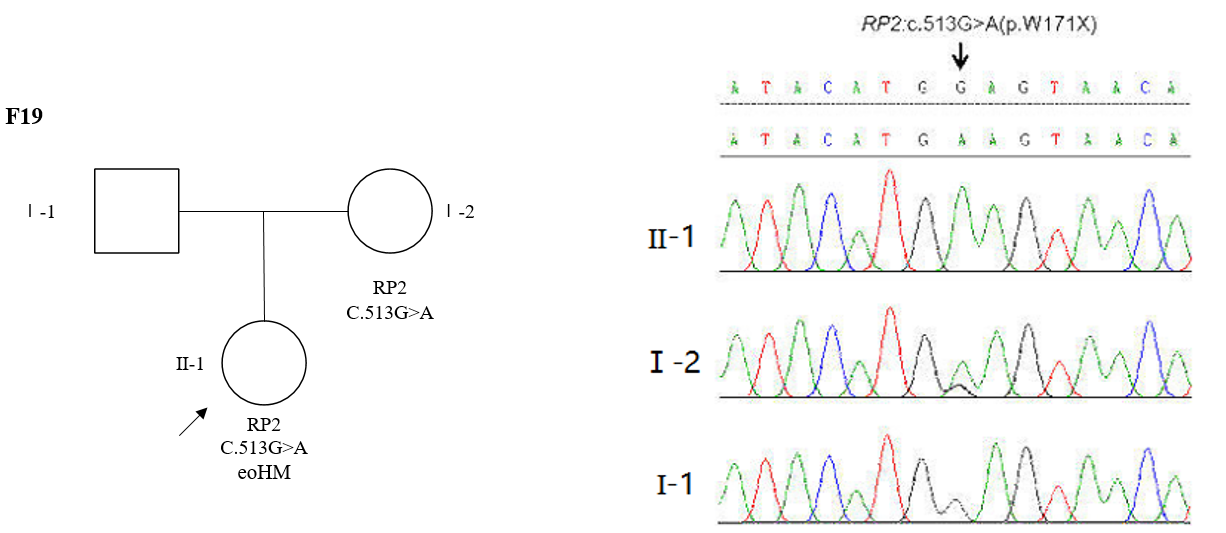


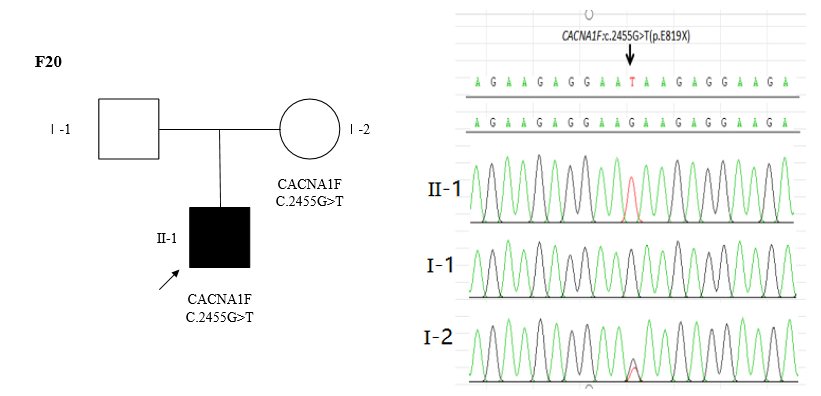

Supplement: Supplementary file 1 [file 4a6679fc351cf60bce035a7b.docx]
